# Supplementary material for: Development and initial validation of the adolescent exercise habits scale (AEHS) among Chinese population
Source: Research Square preprint supplement (doi:10.21203/rs.3.rs-6991427/v1), 2025-07-21
Supplement: Supplementary file 1 [file e0c569c2a3fa3af0fab1b86c.docx]

adolescent exercise habits scale (AEHS)

| Dimensions | Item | Scaling | | | | |
| --- | --- | --- | --- | --- | --- | --- |
| Strongly disagree | Disagree | Neither disagree or agree | Agree | Strongly agree |
| consistency | Participates in moderate-intensity physical activity (e.g., noticeable increase in heart rate and breathing) at least three times per week. |  |  |  |  |  |
| I stick to my exercise routine regardless of whether others (classmates, peers, or friends) do it or not. |  |  |  |  |  |
| I can persist in exercising even when I feel like giving up or taking a break. |  |  |  |  |  |
| I still engage in physical exercise despite heavy academic pressure. |  |  |  |  |  |
| Self-motivation | I actively take part in physical activities both at school and in my free time. |  |  |  |  |  |
| I take the initiative to exercise even without being pushed by teachers or parents. |  |  |  |  |  |
| I actively seek solutions when facing difficulties in physical exercise, such as asking teachers or classmates and looking for information elsewhere. |  |  |  |  |  |
| I am eager to try various sports or learn new sports skills. |  |  |  |  |  |
| daily-life integration | Compared with other activities, I often regard physical exercise as one of my daily life priorities. |  |  |  |  |  |
| Life feels dull and meaningless if I cannot engage in physical exercise. |  |  |  |  |  |
| Daily physical exercise has become a part of my routine. |  |  |  |  |  |
| Like eating and sleeping, physical exercise is a natural part of my daily routine that I do without needing reminders. |  |  |  |  |  |
